# Supplementary material for: circSMARCA5 Is an Upstream Regulator of the Expression of miR-126-3p, miR-515-5p, and Their mRNA Targets, Insulin-like Growth Factor Binding Protein 2 (IGFBP2) and NRAS Proto-Oncogene, GTPase (NRAS) in Glioblastoma
Source: MDPI journal article supplement (doi:10.3390/ijms232213676), 2022-11-08
Supplement: s1 [file s1]

## Supplementary file

### Supplementary Materials and Methods

#### Cell cultures

| GBM Cell line | Cell culture medium                                                                                                                                                                                                                                                                                                                                                                  |
|---------------|--------------------------------------------------------------------------------------------------------------------------------------------------------------------------------------------------------------------------------------------------------------------------------------------------------------------------------------------------------------------------------------|
| A172          | Dulbecco's Modified Eagle's Medium (DMEM) with 4.5 g/L glucose (Sigma-Aldrich, Saint-Louis, MO, USA); 1% Penicillin/Streptomycin (P/S) (100X) (Carlo Erba Reagents, Milan, Italy); 10% Fetal bovine serum (FBS) (Carlo Erba Reagents); 1% Sodium Pyruvate ( $\text{Na}^+\text{Pyr}$ ) (100 mM) (ThermoFisher Scientific); 1% L-Glutamine (L-Glut) (200 mM) (ThermoFisher Scientific) |
| CAS-1         | DMEM with 1 g/L glucose (Sigma-Aldrich); 1% P/S (100X) (Carlo Erba Reagents); 10% FBS; 1% L-Glut (200 mM) (ThermoFisher Scientific)                                                                                                                                                                                                                                                  |
| SNB-19        | DMEM with 1 g/L glucose (Sigma-Aldrich); 1% P/S (100X) (Carlo Erba Reagents); 10% FBS; 1% L-Glut (200 mM) (ThermoFisher Scientific)                                                                                                                                                                                                                                                  |
| U87MG         | DMEM with 1 g/L glucose (Sigma-Aldrich); 1% P/S (100X) (Carlo Erba Reagents); 10% FBS; 1% $\text{Na}^+\text{Pyr}$ (100 mM) (ThermoFisher Scientific); 1% MEM Non-Essential Amino Acids Solution (NEAA) (100X) (ThermoFisher Scientific)                                                                                                                                              |
| U251MG        | Minimum Essential Medium Eagle (MEM) (Sigma-Aldrich); 10% FBS; 1% L-Glut (200 mM) (ThermoFisher Scientific); 1% NEAA (100X) (ThermoFisher Scientific); 1% $\text{Na}^+\text{Pyr}$ (100 mM) (ThermoFisher Scientific)                                                                                                                                                                 |

Cells were grown at 37°C, 5% CO<sub>2</sub>.

## Real-time PCR data representation

Data of the heatmap showing the expression of DE miRNAs retrieved from microRNA TaqMan<sup>®</sup> arrays (Figure 1A) and of the box and whisker plots (Figures 3, 5, S2) were reported as  $-1 \times \text{DCt}$ s. This representation allows to depict the expression of DE miRNAs within each experimental replicate (in the case of the heatmap in Figure 1A) or the distribution of the expression of candidate DE miRNAs or their selected targets within GBM and UC tissues (in the case of box and whisker plots in Figures 3, 5, S2). DCt values were multiplied for “-1”, instead to be reported as is, to render the interpretation of the data more intuitive: lower  $-1 \times \text{DCt}$  values equal to lower expression; higher  $-1 \times \text{DCt}$  values equal to higher expression. FC was calculated according to the  $2^{-\Delta\Delta\text{Ct}}$  method by Livak et al. [1]. FCs were graphed to report relative quantification of the gene expression of single transcripts in GBM cell lines with respect to controls (as reported in Figures 2, 4, S4, S9, S11). Relative quantification has been graphed as logarithm of the FC (Log FC) instead of FC in case of a wider range of FC values for different transcripts shown in a same graph (as in the case of Figures S1, S3).

## Supplementary Tables

| BP                                                                                                           | <i>p</i> -value | #genes | #miRNAs |
|--------------------------------------------------------------------------------------------------------------|-----------------|--------|---------|
| mitotic cell cycle                                                                                           | 0               | 116    | 5       |
| RNA metabolic process                                                                                        | 0               | 81     | 5       |
| nucleobase-containing compound catabolic process                                                             | 0               | 214    | 5       |
| response to stress                                                                                           | 0               | 448    | 6       |
| epidermal growth factor receptor signaling pathway                                                           | 0               | 73     | 6       |
| catabolic process                                                                                            | 0               | 434    | 6       |
| gene expression                                                                                              | 0               | 221    | 6       |
| mRNA metabolic process                                                                                       | 0               | 77     | 6       |
| membrane organization                                                                                        | 0               | 154    | 6       |
| cellular protein modification process                                                                        | 0               | 531    | 7       |
| viral process                                                                                                | 0               | 185    | 7       |
| Fc-epsilon receptor signaling pathway                                                                        | 0               | 64     | 7       |
| small molecule metabolic process                                                                             | 0               | 473    | 7       |
| symbiosis encompassing mutualism through parasitism                                                          | 0               | 202    | 7       |
| neurotrophin TRK receptor signaling pathway                                                                  | 0               | 89     | 7       |
| biological_process                                                                                           | 0               | 2673   | 8       |
| biosynthetic process                                                                                         | 0               | 864    | 8       |
| cellular nitrogen compound metabolic process                                                                 | 0               | 1056   | 9       |
| macromolecular complex assembly                                                                              | 1.11E-16        | 187    | 5       |
| fibroblast growth factor receptor signaling pathway                                                          | 1.11E-16        | 68     | 6       |
| cellular protein metabolic process                                                                           | 1.11E-15        | 103    | 4       |
| cell death                                                                                                   | 9.33E-15        | 199    | 5       |
| cellular component assembly                                                                                  | 3.99E-14        | 245    | 5       |
| blood coagulation                                                                                            | 1.34E-11        | 100    | 6       |
| transcription DNA-templated                                                                                  | 1.36E-09        | 363    | 3       |
| protein complex assembly                                                                                     | 3.81E-09        | 149    | 5       |
| transcription initiation from RNA polymerase II promoter                                                     | 1.31E-08        | 64     | 4       |
| platelet activation                                                                                          | 5.94E-08        | 49     | 5       |
| DNA metabolic process                                                                                        | 4.05E-07        | 131    | 3       |
| phosphatidylinositol-mediated signaling                                                                      | 3.47E-06        | 38     | 4       |
| viral life cycle                                                                                             | 9.14E-06        | 37     | 5       |
| immune system process                                                                                        | 1.73E-05        | 193    | 4       |
| activation of signaling protein activity involved in unfolded protein response                               | 1.91E-05        | 24     | 4       |
| Fc-gamma receptor signaling pathway involved in phagocytosis                                                 | 2.36E-05        | 24     | 4       |
| innate immune response                                                                                       | 4.45E-05        | 102    | 3       |
| insulin receptor signaling pathway                                                                           | 0.000257        | 38     | 3       |
| cellular lipid metabolic process                                                                             | 0.000272        | 37     | 3       |
| transforming growth factor beta receptor signaling pathway                                                   | 0.000486        | 55     | 4       |
| positive regulation of protein insertion into mitochondrial membrane involved in apoptotic signaling pathway | 0.00066         | 14     | 3       |
| nuclear-transcribed mRNA catabolic process, deadenylation-dependent decay                                    | 0.001442        | 19     | 2       |
| intrinsic apoptotic signaling pathway                                                                        | 0.001528        | 22     | 3       |
| protein N-linked glycosylation via asparagine                                                                | 0.008387        | 24     | 3       |

|                                                                                    |          |      |    |
|------------------------------------------------------------------------------------|----------|------|----|
| intracellular transport of virus                                                   | 0.008913 | 11   | 3  |
| generation of precursor metabolites and energy                                     | 0.009188 | 45   | 2  |
| nucleocytoplasmic transport                                                        | 0.015385 | 74   | 3  |
| regulation of transcription from RNA polymerase II promoter in response to hypoxia | 0.025085 | 12   | 3  |
| RNA splicing                                                                       | 0.025458 | 67   | 4  |
| chromatin organization                                                             | 0.029824 | 23   | 2  |
| cell cycle                                                                         | 0.032523 | 154  | 3  |
| post-translational protein modification                                            | 0.042609 | 25   | 2  |
| transcription DNA-templated                                                        | 0        | 492  | 3  |
| nucleic acid binding transcription factor activity                                 | 0        | 247  | 5  |
| epidermal growth factor receptor signaling pathway                                 | 0        | 75   | 5  |
| RNA metabolic process                                                              | 0        | 88   | 5  |
| mRNA metabolic process                                                             | 0        | 83   | 5  |
| nucleobase-containing compound catabolic process                                   | 0        | 240  | 5  |
| small molecule metabolic process                                                   | 0        | 518  | 5  |
| membrane organization                                                              | 0        | 181  | 5  |
| mitotic cell cycle                                                                 | 0        | 133  | 6  |
| cell death                                                                         | 0        | 249  | 6  |
| catabolic process                                                                  | 0        | 497  | 6  |
| Fc-epsilon receptor signaling pathway                                              | 0        | 69   | 6  |
| cellular protein metabolic process                                                 | 0        | 153  | 6  |
| symbiosis encompassing mutualism through parasitism                                | 0        | 190  | 6  |
| poly(A) RNA binding                                                                | 0        | 437  | 6  |
| RNA binding                                                                        | 0        | 540  | 7  |
| cellular protein modification process                                              | 0        | 642  | 7  |
| response to stress                                                                 | 0        | 570  | 7  |
| viral process                                                                      | 0        | 173  | 7  |
| neurotrophin TRK receptor signaling pathway                                        | 0        | 102  | 7  |
| protein binding transcription factor activity                                      | 0        | 171  | 8  |
| molecular_function                                                                 | 0        | 3450 | 8  |
| cellular_component                                                                 | 0        | 3473 | 8  |
| nucleoplasm                                                                        | 0        | 383  | 8  |
| cytosol                                                                            | 0        | 767  | 8  |
| biological_process                                                                 | 0        | 3361 | 8  |
| biosynthetic process                                                               | 0        | 1075 | 8  |
| gene expression                                                                    | 0        | 247  | 8  |
| enzyme binding                                                                     | 0        | 416  | 9  |
| cellular nitrogen compound metabolic process                                       | 0        | 1340 | 9  |
| ion binding                                                                        | 0        | 1426 | 9  |
| protein complex                                                                    | 0        | 990  | 9  |
| organelle                                                                          | 0        | 2571 | 10 |
| cellular component assembly                                                        | 1.11E-16 | 318  | 6  |
| macromolecular complex assembly                                                    | 2.22E-16 | 217  | 4  |
| intrinsic apoptotic signaling pathway                                              | 4.27E-13 | 33   | 5  |
| DNA metabolic process                                                              | 6.75E-13 | 193  | 4  |
| blood coagulation                                                                  | 2.30E-12 | 124  | 5  |
| fibroblast growth factor receptor signaling pathway                                | 2.91E-12 | 63   | 4  |

|                                                                                                              |          |     |   |
|--------------------------------------------------------------------------------------------------------------|----------|-----|---|
| protein complex assembly                                                                                     | 1.54E-09 | 159 | 3 |
| cytoskeletal protein binding                                                                                 | 1.26E-08 | 155 | 4 |
| immune system process                                                                                        | 1.57E-07 | 317 | 5 |
| positive regulation of protein insertion into mitochondrial membrane involved in apoptotic signaling pathway | 3.21E-07 | 15  | 3 |
| mRNA processing                                                                                              | 6.84E-07 | 118 | 4 |
| phosphatidylinositol-mediated signaling                                                                      | 8.46E-07 | 41  | 5 |
| chromatin organization                                                                                       | 4.55E-06 | 40  | 2 |
| innate immune response                                                                                       | 5.67E-06 | 155 | 5 |
| RNA splicing                                                                                                 | 6.28E-06 | 76  | 4 |
| post-translational protein modification                                                                      | 1.87E-05 | 49  | 3 |
| enzyme regulator activity                                                                                    | 2.38E-05 | 175 | 6 |
| protein N-linked glycosylation via asparagine                                                                | 6.80E-05 | 36  | 3 |
| Fc-gamma receptor signaling pathway involved in phagocytosis                                                 | 8.21E-05 | 26  | 4 |
| vesicle-mediated transport                                                                                   | 0.000135 | 186 | 4 |
| TRIF-dependent toll-like receptor signaling pathway                                                          | 0.000306 | 23  | 3 |
| insulin receptor signaling pathway                                                                           | 0.000424 | 41  | 2 |
| G2/M transition of mitotic cell cycle                                                                        | 0.000723 | 41  | 3 |
| transcription initiation from RNA polymerase II promoter                                                     | 0.000862 | 46  | 2 |
| regulation of ubiquitin-protein ligase activity involved in mitotic cell cycle                               | 0.000902 | 20  | 2 |
| cell junction organization                                                                                   | 0.000974 | 37  | 3 |
| platelet activation                                                                                          | 0.00151  | 40  | 2 |
| nuclear-transcribed mRNA catabolic process deadenylation-dependent decay                                     | 0.001638 | 26  | 3 |
| DNA damage response signal transduction by p53 class mediator resulting in cell cycle arrest                 | 0.001658 | 20  | 3 |
| G1/S transition of mitotic cell cycle                                                                        | 0.001779 | 33  | 2 |
| termination of RNA polymerase II transcription                                                               | 0.001873 | 12  | 3 |
| MyD88-independent toll-like receptor signaling pathway                                                       | 0.002002 | 23  | 3 |
| nucleocytoplasmic transport                                                                                  | 0.00228  | 87  | 4 |
| toll-like receptor 10 signaling pathway                                                                      | 0.002322 | 14  | 2 |
| activation of signaling protein activity involved in unfolded protein response                               | 0.003314 | 20  | 2 |
| transforming growth factor beta receptor signaling pathway                                                   | 0.003491 | 35  | 3 |
| positive regulation of ubiquitin-protein ligase activity involved in mitotic cell cycle                      | 0.004084 | 19  | 2 |
| negative regulation of transcription from RNA polymerase II promoter                                         | 0.004807 | 137 | 2 |
| microtubule organizing center                                                                                | 0.005126 | 84  | 2 |
| cellular component disassembly involved in execution phase of apoptosis                                      | 0.005151 | 15  | 2 |
| toll-like receptor TLR1:TLR2 signaling pathway                                                               | 0.005269 | 14  | 2 |
| toll-like receptor TLR6:TLR2 signaling pathway                                                               | 0.005269 | 14  | 2 |
| transcription from RNA polymerase II promoter                                                                | 0.005672 | 68  | 3 |
| activation of MAPKK activity                                                                                 | 0.007435 | 24  | 2 |
| mRNA splicing via spliceosome                                                                                | 0.009072 | 37  | 2 |
| endosome                                                                                                     | 0.00946  | 115 | 2 |

|                                                                                                |          |     |   |
|------------------------------------------------------------------------------------------------|----------|-----|---|
| toll-like receptor 5 signaling pathway                                                         | 0.011013 | 14  | 2 |
| toll-like receptor 3 signaling pathway                                                         | 0.012502 | 23  | 3 |
| transcription corepressor activity                                                             | 0.012882 | 50  | 3 |
| negative regulation of transcription DNA-templated                                             | 0.014306 | 164 | 3 |
| anaphase-promoting complex-dependent proteasomal ubiquitin-dependent protein catabolic process | 0.016159 | 21  | 2 |
| transcription factor binding                                                                   | 0.01617  | 122 | 3 |
| mRNA 3'-end processing                                                                         | 0.019622 | 11  | 2 |
| positive regulation of transcription DNA-templated                                             | 0.020599 | 112 | 2 |
| protein polyubiquitination                                                                     | 0.021583 | 41  | 3 |
| stress-activated MAPK cascade                                                                  | 0.024626 | 17  | 3 |
| toll-like receptor 4 signaling pathway                                                         | 0.024729 | 24  | 3 |
| protein targeting                                                                              | 0.027749 | 53  | 2 |
| toll-like receptor 9 signaling pathway                                                         | 0.03085  | 14  | 2 |
| nuclear-transcribed mRNA catabolic process nonsense-mediated decay                             | 0.038054 | 19  | 1 |
| endoplasmic reticulum unfolded protein response                                                | 0.047635 | 29  | 2 |
| cell cycle                                                                                     | 0.049449 | 113 | 2 |

**Table S1.** Biological pathways (BP) significantly enriched, based on DIANA miRPath data analysis. In red and green are shown BPs regulated by candidate upregulated and downregulated miRNAs, respectively.

| <b>DE miRNA</b> | <b>Candidate mRNA target</b> | <b>Type of cancer where the targeting has been described</b>        | <b>Bibliographic reference</b> |
|-----------------|------------------------------|---------------------------------------------------------------------|--------------------------------|
| miR-126-3p      | <i>CRK</i>                   | Target of miR-126-3p and oncogene in lung cancer                    | [2]                            |
| miR-126-3p      | <i>IGFBP2</i>                | Target of miR-126-3p and oncogene in glioma                         | [3]                            |
| miR-126-3p      | <i>IRS1</i>                  | Target of miR-126-3p and oncogene in glioma                         | [3]                            |
| miR-126-3p      | <i>KRAS</i>                  | Target of miR-126-3p and oncogene in glioma                         | [3,4]                          |
| miR-126-3p      | <i>LRP6</i>                  | Target of miR-126-3p and oncogene in hepatocellular carcinoma       | [5]                            |
| miR-126-3p      | <i>PLXNB2</i>                | Target of miR-126-3p and oncogene in glioma                         | [6]                            |
| miR-126-3p      | <i>SOX2</i>                  | Target of miR-126-3p and oncogene in glioma                         | [7]                            |
| miR-126-3p      | <i>SPRED1</i>                | Target of miR-126-3p and oncogene in hepatocellular carcinoma       | [8]                            |
| miR-126-3p      | <i>VCAM-1</i>                | Target of miR-126-3p and oncogene in lung cancer                    | [2]                            |
| miR-515-5p      | <i>MAPK4</i>                 | Target of miR-515-5p and oncogene in breast cancer                  | [9]                            |
| miR-515-5p      | <i>MARK4</i>                 | Target of miR-515-5p and oncogene in glioma, breast and lung cancer | [10,11]                        |
| miR-515-5p      | <i>NFE2L1</i>                | Target of miR-515-5p and oncogene in glioma                         | [12]                           |
| miR-515-5p      | <i>NRAS</i>                  | Target of miR-515-5p and oncogene in breast and lung cancer         | [11]                           |
| miR-515-5p      | <i>ROCK1</i>                 | Target of miR-515-5p and oncogene in glioma                         | [12]                           |

|            |               |                                                                         |      |
|------------|---------------|-------------------------------------------------------------------------|------|
| miR-515-5p | <i>SOD2</i>   | Target of miR-515-5p<br>and oncogene in<br>glioma                       | [13] |
| miR-515-5p | <i>TCF12</i>  | Target of miR-515-5p<br>and oncogene in<br>glioma and ovarian<br>cancer | [9]  |
| miR-515-5p | <i>TRIP13</i> | Target of miR-515-5p<br>and oncogene in<br>prostate cancer              | [9]  |

**Table S2.** List of validated candidate targets of miR-126-3p and miR-515-5p.



| Sample                          | N  | Mean Age<br>(Years $\pm$<br>StdDev) | Sex  |        |
|---------------------------------|----|-------------------------------------|------|--------|
|                                 |    |                                     | Male | Female |
| Fresh frozen<br>GBM<br>biopsies | 38 | 65.4 $\pm$ 10.3                     | 20   | 18     |
| Fresh frozen<br>UCs             | 21 | 64.9 $\pm$ 10.5                     | 10   | 11     |

**Table S3.** Demographic data including sex and age of the study group.

| Candidate HK<br>miRNA | <i>r</i> -value<br>(Pearson's<br>correlation<br>vs Mean<br>Ct) | <i>r</i> -value<br>(Pearson's<br>correlation<br>vs Median<br>Ct) | <i>p</i> -value<br>(Pearson's<br>correlation<br>vs Mean<br>Ct) | <i>p</i> -value<br>(Pearson's<br>correlation<br>vs Median<br>Ct) |
|-----------------------|----------------------------------------------------------------|------------------------------------------------------------------|----------------------------------------------------------------|------------------------------------------------------------------|
| miR-192-5p            | 0.996                                                          | 0.9858                                                           | ****                                                           | ****                                                             |
| miR-106a-5p           | 0.9929                                                         | 0.9904                                                           | ****                                                           | ****                                                             |
| miR-374a-5p           | 0.9919                                                         | 0.967                                                            | ****                                                           | ***                                                              |
| miR-155-5p            | 0.9904                                                         | 0.947                                                            | ****                                                           | **                                                               |
| miR-532-5p            | 0.9887                                                         | 0.9828                                                           | ****                                                           | ****                                                             |
| miR-100-5p            | 0.981                                                          | 0.9901                                                           | ****                                                           | ****                                                             |
| miR-17-5p             | 0.9809                                                         | 0.9546                                                           | ****                                                           | ***                                                              |
| miR-28-5p             | 0.979                                                          | 0.9545                                                           | ***                                                            | ***                                                              |
| let-7g-5p             | 0.977                                                          | 0.9419                                                           | ***                                                            | **                                                               |
| miR-660-5p            | 0.9767                                                         | 0.9775                                                           | ***                                                            | ***                                                              |
| miR-361-5p            | 0.9763                                                         | 0.9754                                                           | ***                                                            | ***                                                              |
| miR-25-3p             | 0.9757                                                         | 0.9157                                                           | ***                                                            | **                                                               |
| miR-222-3p            | 0.9756                                                         | 0.984                                                            | ***                                                            | ****                                                             |
| miR-26a-5p            | 0.9754                                                         | 0.9898                                                           | ***                                                            | ****                                                             |
| miR-15b-5p            | 0.9751                                                         | 0.9714                                                           | ***                                                            | ***                                                              |
| miR-1203              | 0.9242                                                         | 0.9029                                                           | **                                                             | *                                                                |
| miR-452-3p            | 0.9548                                                         | 0.8758                                                           | **                                                             | *                                                                |
| miR-19a-5p            | 0.9301                                                         | 0.8317                                                           | **                                                             | *                                                                |

**Table S4.** Candidate endogenous control (HK) miRNAs given as input to RefFinder. In green and yellow are represented candidate HK miRNAs of Array Cards A and B, respectively. \*\*\*\* *p*-value < 0.0001, \*\*\* *p*-value < 0.001, \*\* *p*-value < 0.01, \* *p*-value < 0.05.

| circRNA/miRNA/mRNA name | Forward primer sequence  | Reverse primer sequence  | TaqMan® Probe (Assay ID – ThermoFisher Scientific) |
|-------------------------|--------------------------|--------------------------|----------------------------------------------------|
| circSMARCA5             | ACAATGGATACAGAGTCAAGTGTT | CACATGTGTTGCTCCATGTCT    |                                                    |
| miR-106a-5p             |                          |                          | 002169                                             |
| miR-126-3p              |                          |                          | 002228                                             |
| miR-144-5p              |                          |                          | 002148                                             |
| miR-192-5p              |                          |                          | 000491                                             |
| miR-331-3p              |                          |                          | 000545                                             |
| miR-515-5p              |                          |                          | 001112                                             |
| miR-517a-3p             |                          |                          | 002402                                             |
| miR-1257                |                          |                          | 002910                                             |
| U6                      |                          |                          | 001973                                             |
| <i>IGFBP2</i>           | TGCACATCCCCAACTGTGAC     | TGTAGAAGAGATGACACTCGGG   |                                                    |
| <i>NRAS</i>             | TGGGATTGCCATGTGTGGTG     | AGGGTGTCAGTGCAGCTTG      |                                                    |
| <i>PLXNB2</i>           | CCTGGTGATCCCCATGAACC     | ACCGGCTCCATGAACTTGAG     |                                                    |
| <i>ROCK1</i>            | AACATGCTGCTGGATAAATCTGG  | TGTATCACATCGTACCATGCCT   |                                                    |
| <i>SOD2</i>             | TTTCAATAAGGAACGGGGACAC   | GTGCTCCCACACATCAATCC     |                                                    |
| <i>TBP</i>              | ACTTGACCTAAAGACCATTGCA   | GGCTCTCTTATCCTCATGATTACC |                                                    |
| <i>TCF12</i>            | AGTTATCCATCTCCTAAGCCACC  | AAGAATTGTGGGTCCCATCTTG   |                                                    |
| <i>TRIP13</i>           | AGCTGAATGAAGATGGCCCC     | TACCAAGCTGTCCCAAAGCC     |                                                    |
| <i>VCAM1</i>            | CAGTAAGGCAGGCTGTAAAAGA   | TGGAGCTGGTAGACCCTCG      |                                                    |

**Table S5.** Primer sequences and TaqMan® assay IDs used in this study. U6 was used as HK miRNAs to assay candidate miRNA expression in biopsies and GBM cell lines. *TBP* was used as HK to assay the expression of circSMARCA5 and the candidate miRNA targets.

# Supplementary Figures

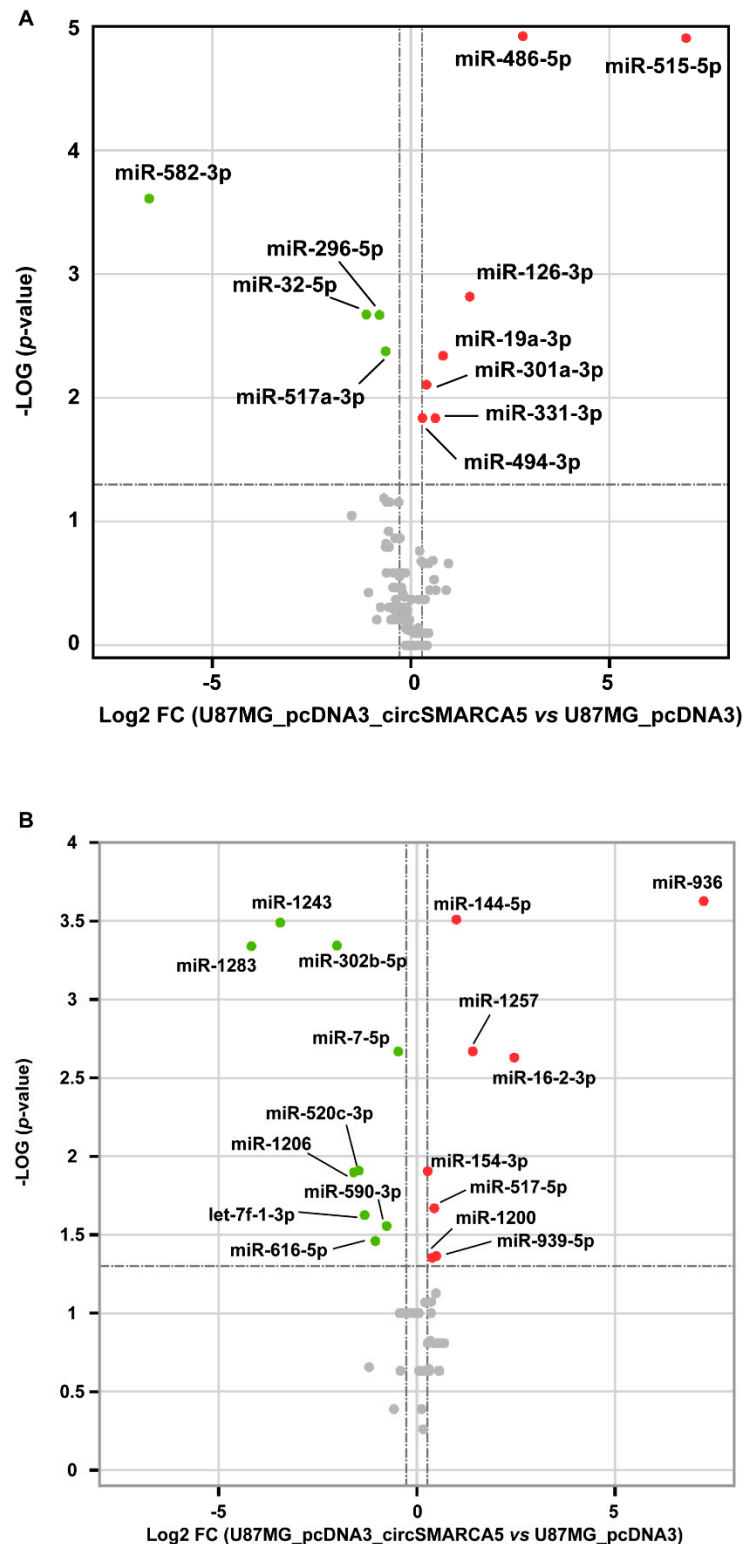

**Figure S1.** Volcano plots representing DE miRNAs retrieved from data analysis of TaqMan<sup>®</sup> Array MicroRNA Cards A (A) and B (B). Green and red dots represent statistically significant downregulated and upregulated DE miRNAs, respectively. Grey dots represent miRNAs that resulted not DE, based on SAM analysis. Volcano plots were generated by <https://www.bioinformatics.com.cn/en>, a free online platform for data analysis and visualization.

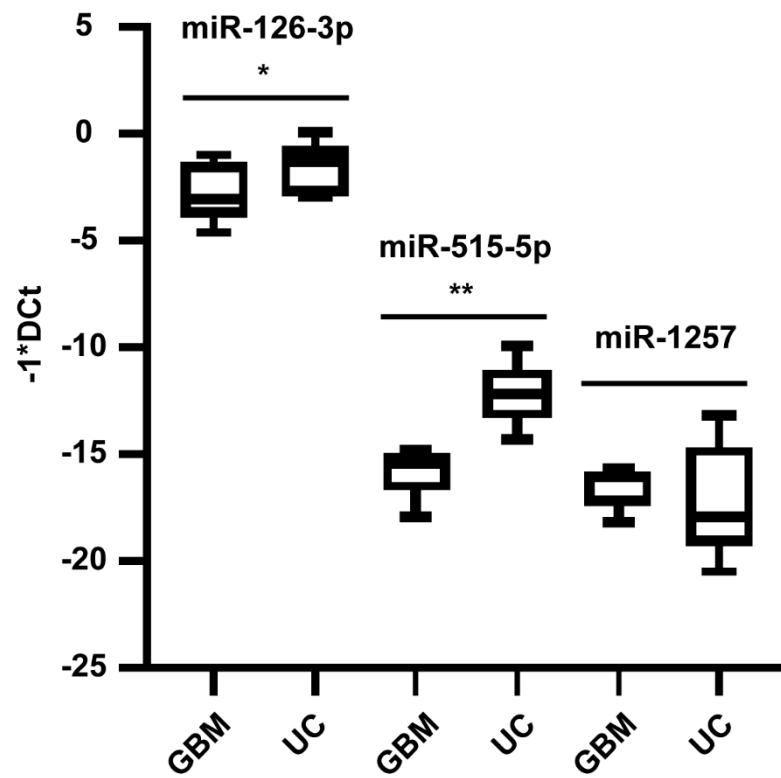

**Figure S2.** Box and whisker plots representing the expression of miR-126-3p, miR-515-5p and miR-1257 in GBM and UC biopsies. Data are reported as  $-1 \times \text{DCt}$ . \*  $p$ -value  $< 0.05$ , \*\*  $p$ -value  $< 0.01$  ( $n = 5$ , Student's  $t$ -test).

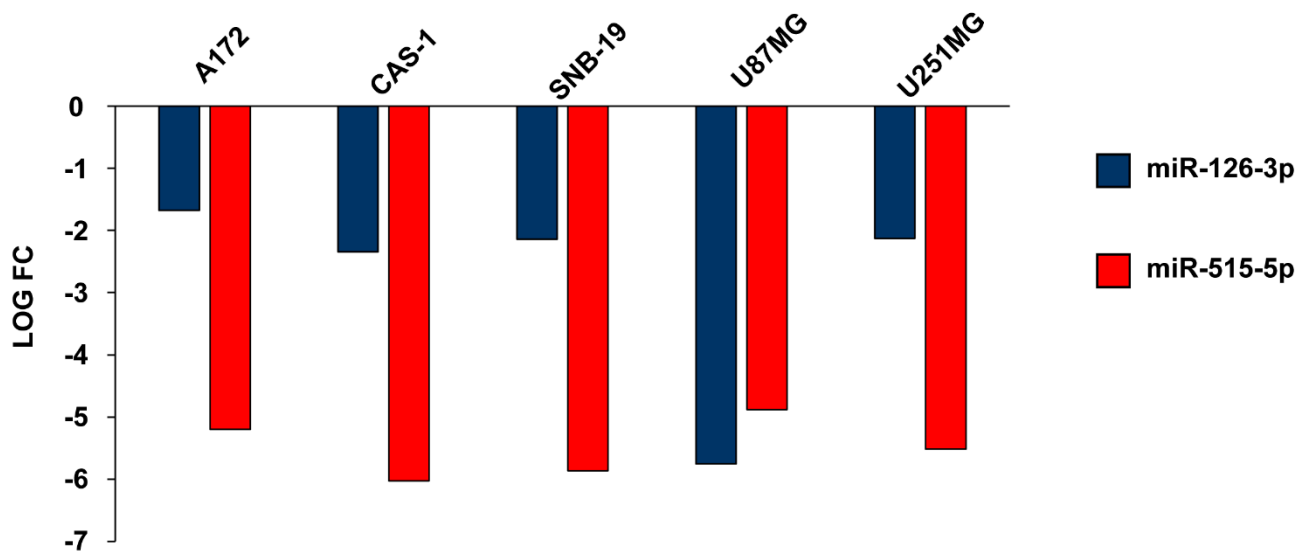

**Figure S3. Expression of candidate miR-126-3p (blue bars) and miR-515-5p (red bars) in GBM cell lines.** Data are reported as LOG fold-change (FC) of the expression of candidate miRNAs in each cell line vs FirstChoice<sup>®</sup> Human Brain Reference RNA (Ambion, Austin, TX, USA).

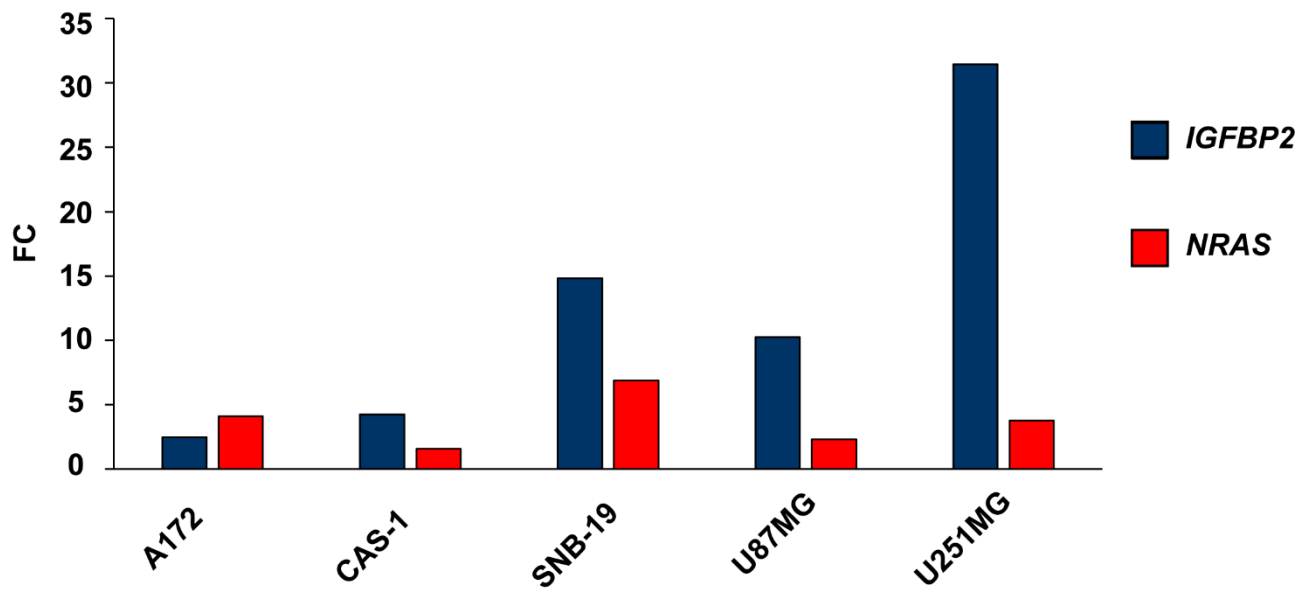

**Figure S4. Expression of *IGFBP2* (blue bars) and *NRAS* (red bars) mRNA in GBM cell lines.** Data are reported as fold-change (FC) of the expression of mRNA targets in each cell line vs FirstChoice<sup>®</sup> Human Brain Reference RNA (Ambion, Austin, TX, USA).

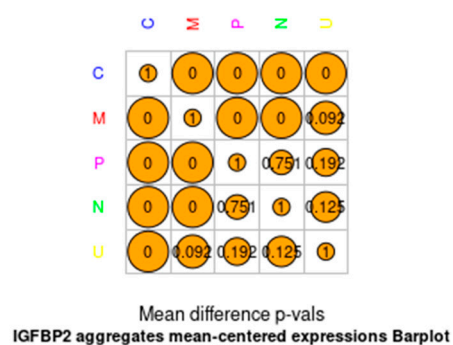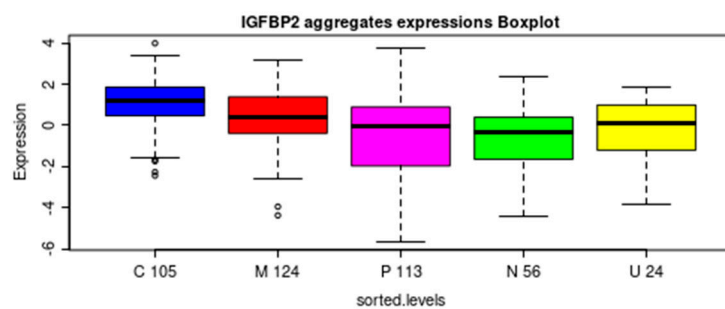

**Figure S5.** Expression of *IGFBP2* mRNA in Classical (C), Mesenchymal (M), Proneural (P), Neural (N) and Unclassified (U) GBM subtypes (data from GBM-BioDP).

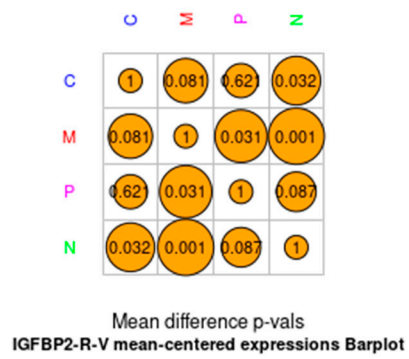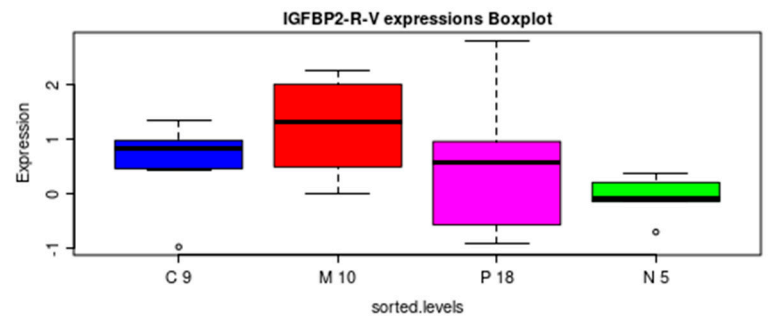

**Figure S6.** Expression of IGFBP2 protein in Classical (C), Mesenchymal (M), Proneural (P), Neural (N) GBM subtypes (data from GBM-BioDP).



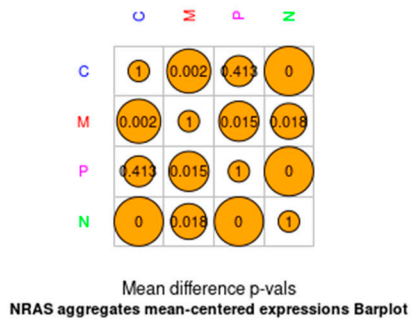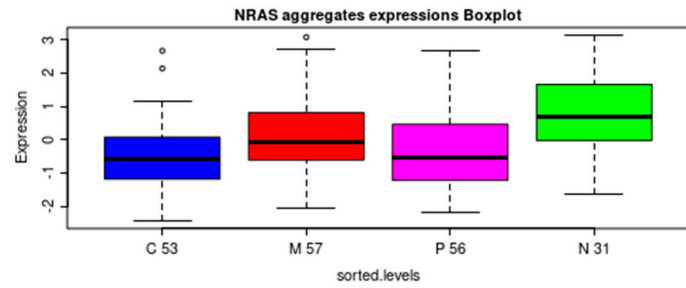

**Figure S7.** Expression of *NRAS* mRNA in Classical (C), Mesenchymal (M), Proneural (P), Neural (N) GBM subtypes (data from GBM-BioDP).

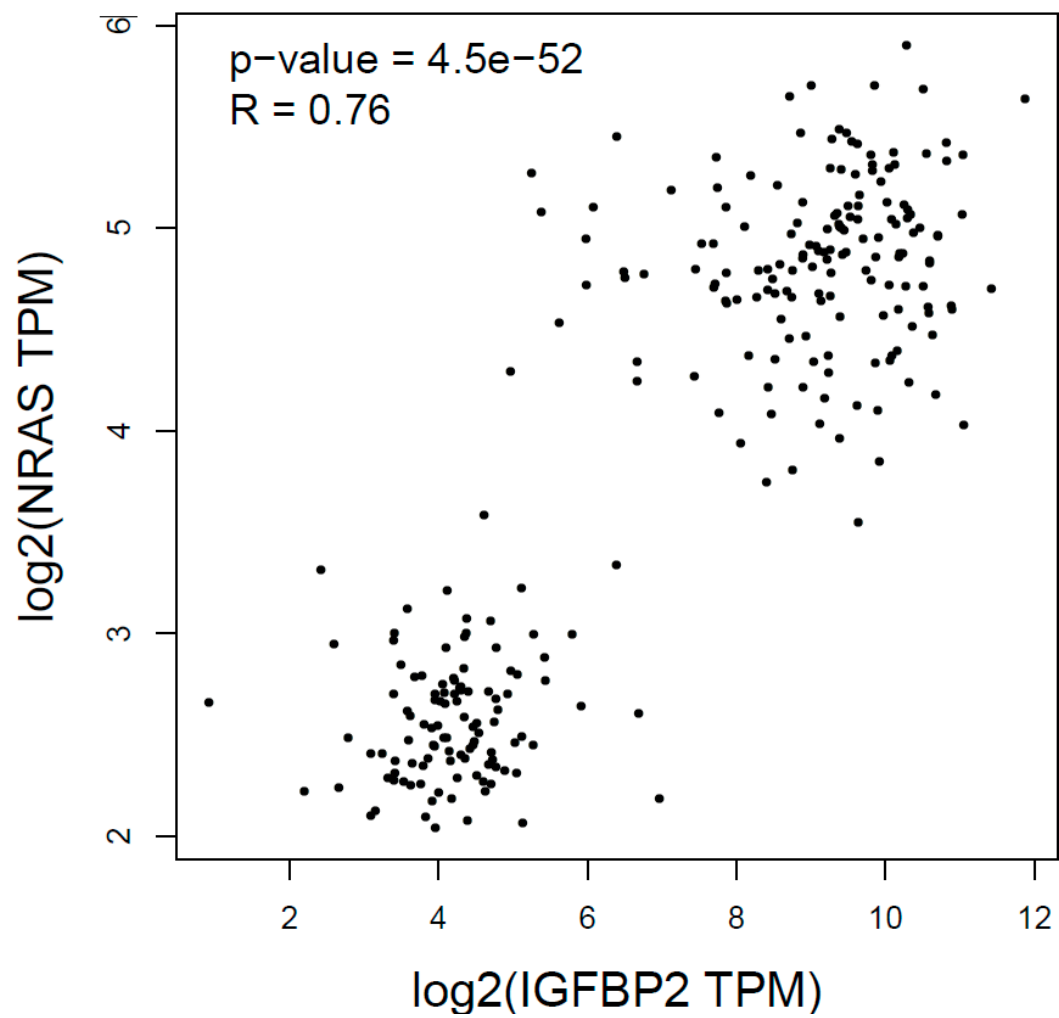

**Figure S8.** Scatter plot of the correlation between *IGFBP2* and *NRAS* mRNAs (data from GEPIA).

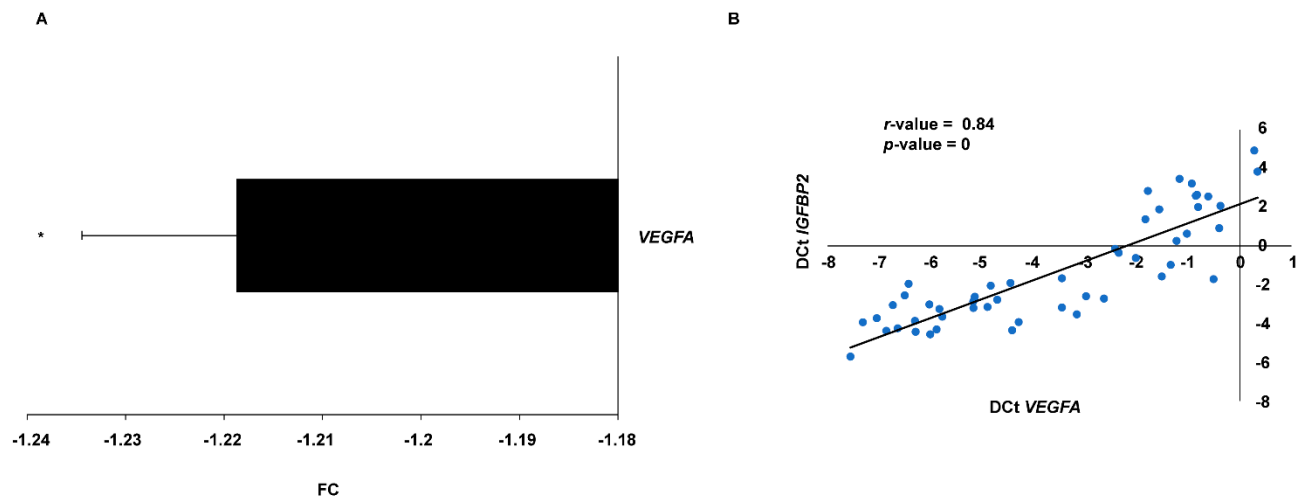

**Figure S9.** (A) *VEGFA* mRNA expression in U87MG overexpressing circSMARCA5. Data are reported as FC vs U87MG\_pcDNA3 (\*  $p$ -value < 0.05,  $n = 3$ , Student's t-test). (B) Scatter plot of the correlation between the expression of *VEGFA* and *IGFBP2* mRNA, calculated within the validation set cohort.

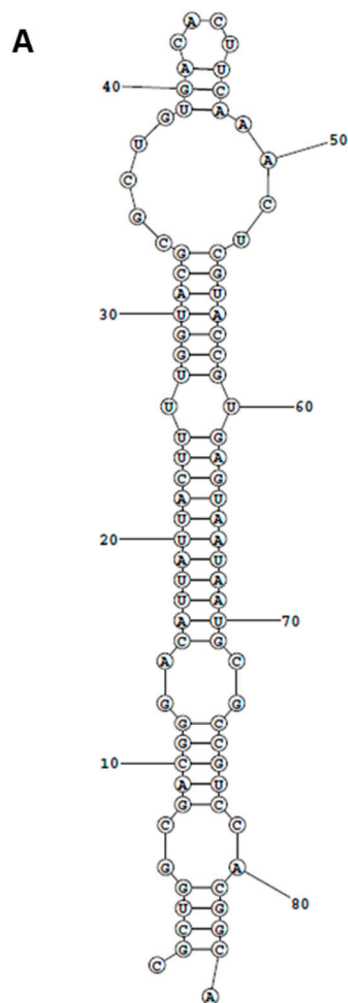

ENERGY = -71.1 mir-126

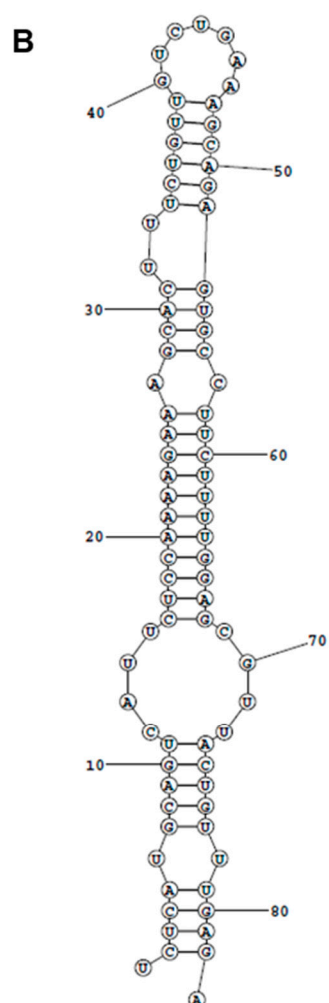

ENERGY = -71.1 mir-515

**Figure S10.** The most stable predicted secondary structures of pre-miRNAs 126 and 515-1, based on the tool *RNA Structure*.

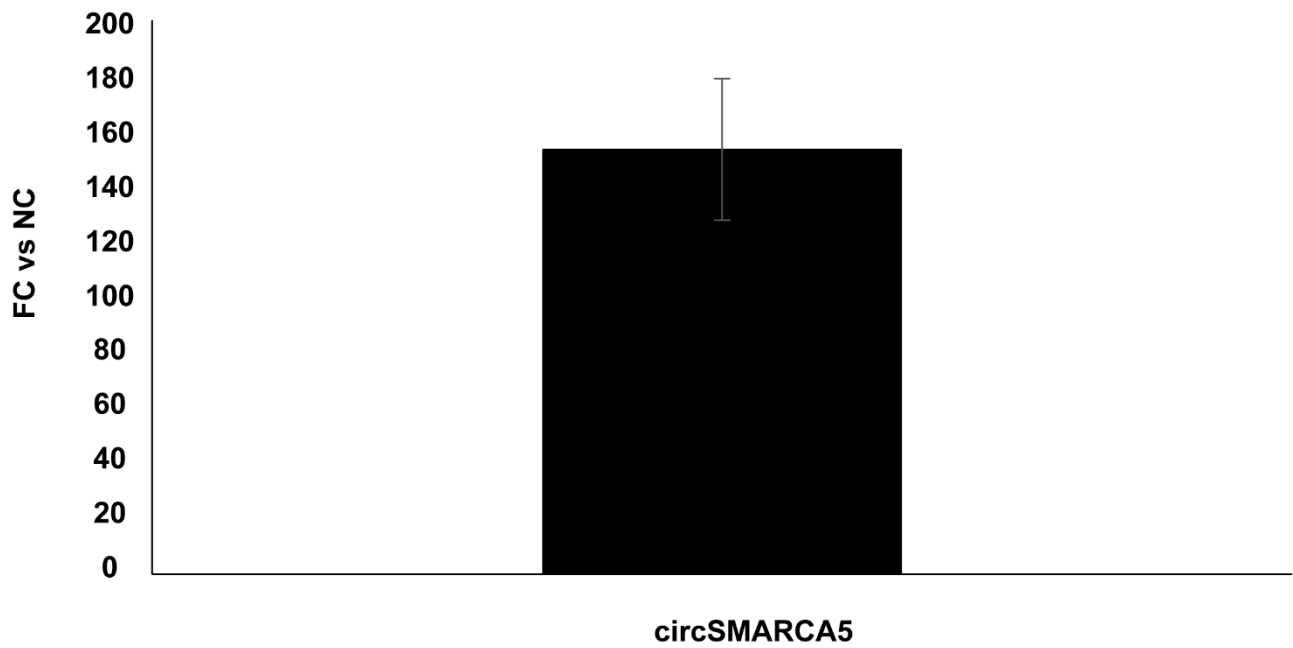

**Figure S11.** Expression of circSMARCA5 in U87MG transfected with pcDNA3\_circSMARCA5. Data are reported as fold-change (FC) of the expression of circSMARCA5 in U87MG pcDNA3\_circSMARCA5 vs U87MG pcDNA3.

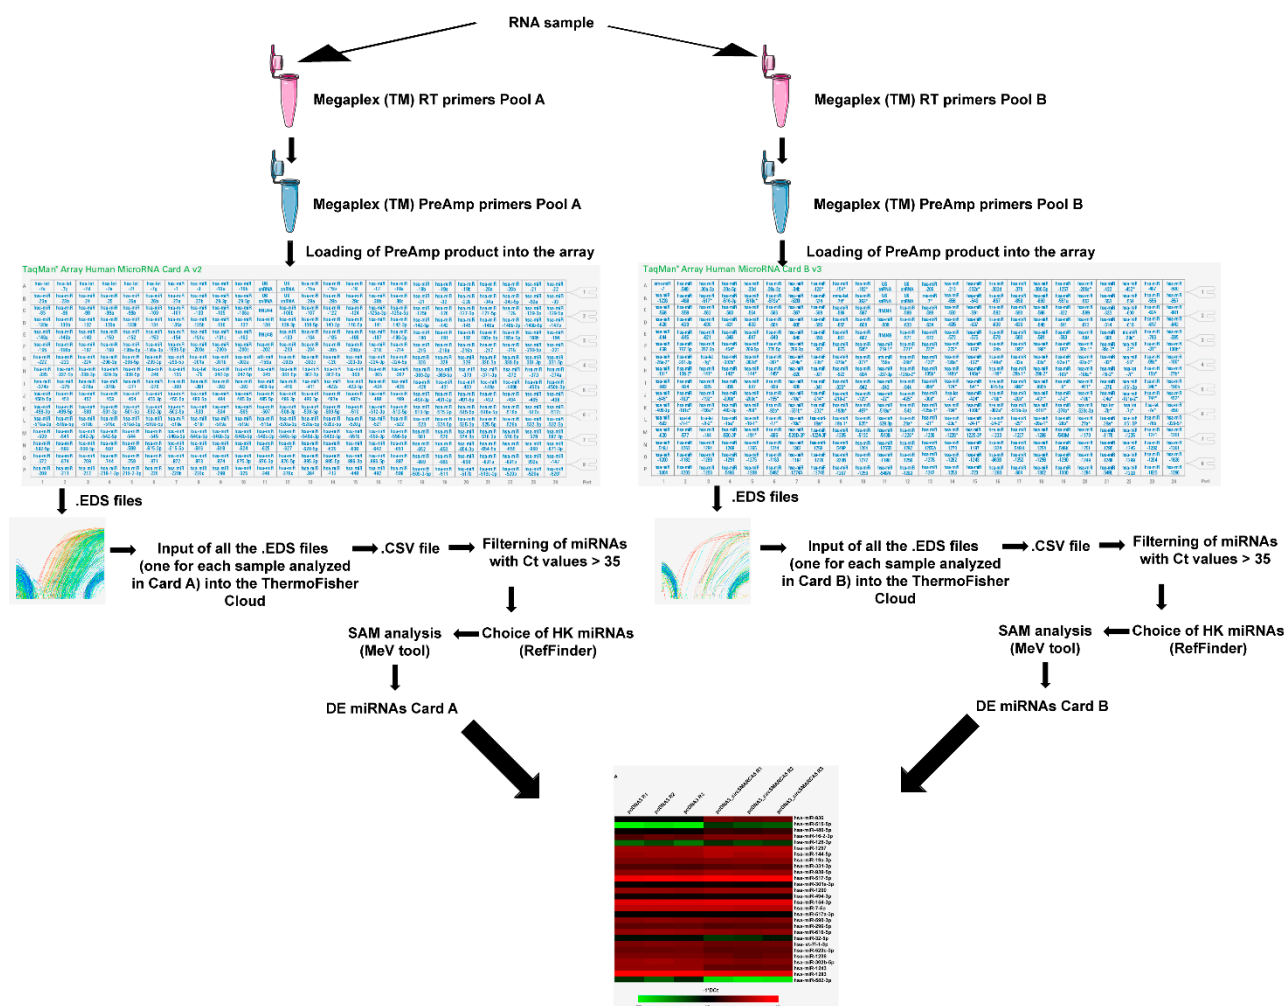

**Figure S12.** Graphical representation of microRNA TaqMan® Arrays' data analysis. The figure was partly generated using Servier Medical Art, provided by Servier, licensed under a Creative Commons Attribution 3.0 unported license.

## Supplementary references

1. Livak, K.J.; Schmittgen, T.D. Analysis of relative gene expression data using real-time quantitative PCR and the 2(-Delta Delta C(T)) Method. *Methods* **2001**, *25*, 402-408, doi:10.1006/meth.2001.1262.
2. Han, I.B.; Kim, M.; Lee, S.H.; Kim, J.K.; Kim, S.H.; Chang, J.H.; Teng, Y.D. Down-regulation of MicroRNA-126 in Glioblastoma and its Correlation with Patient Prognosis: A Pilot Study. *Anticancer Res* **2016**, *36*, 6691-6697, doi:10.21873/anticancer.11280.
3. Rouigari, M.; Dehbashi, M.; Ghaedi, K.; Pourhossein, M. Targetome Analysis Revealed Involvement of MiR-126 in Neurotrophin Signaling Pathway: A Possible Role in Prevention of Glioma Development. *Cell J* **2018**, *20*, 150-156, doi:10.22074/cellj.2018.4901.
4. Chen, S.R.; Cai, W.P.; Dai, X.J.; Guo, A.S.; Chen, H.P.; Lin, G.S.; Lin, R.S. Research on miR-126 in glioma targeted regulation of PTEN/PI3K/Akt and MDM2-p53 pathways. *Eur Rev Med Pharmacol Sci* **2019**, *23*, 3461-3470, doi:10.26355/eurrev\_201904\_17711.
5. Du, C.; Lv, Z.; Cao, L.; Ding, C.; Gyabaah, O.A.; Xie, H.; Zhou, L.; Wu, J.; Zheng, S. MiR-126-3p suppresses tumor metastasis and angiogenesis of hepatocellular carcinoma by targeting LRP6 and PIK3R2. *J Transl Med* **2014**, *12*, 259, doi:10.1186/s12967-014-0259-1.
6. Xiang, G.; Cheng, Y. MiR-126-3p inhibits ovarian cancer proliferation and invasion via targeting PLXNB2. *Reprod Biol* **2018**, *18*, 218-224, doi:10.1016/j.repbio.2018.07.005.
7. Luo, W.; Yan, D.; Song, Z.; Zhu, X.; Liu, X.; Li, X.; Zhao, S. miR-126-3p sensitizes glioblastoma cells to temozolomide by inactivating Wnt/beta-catenin signaling via targeting SOX2. *Life Sci* **2019**, *226*, 98-106, doi:10.1016/j.lfs.2019.04.023.
8. Tan, W.; Lin, Z.; Chen, X.; Li, W.; Zhu, S.; Wei, Y.; Huo, L.; Chen, Y.; Shang, C. miR-126-3p contributes to sorafenib resistance in hepatocellular carcinoma via downregulating SPRED1. *Ann Transl Med* **2021**, *9*, 38, doi:10.21037/atm-20-2081.
9. Zheng, K.; Xie, H.; Wu, W.; Wen, X.; Zeng, Z.; Shi, Y. CircRNA PIP5K1A promotes the progression of glioma through upregulation of the TCF12/PI3K/AKT pathway by sponging miR-515-5p. *Cancer Cell Int* **2021**, *21*, 27, doi:10.1186/s12935-020-01699-6.
10. Naqvi, A.A.T.; Jairajpuri, D.S.; Hussain, A.; Hasan, G.M.; Alajmi, M.F.; Hassan, M.I. Impact of glioblastoma multiforme associated mutations on the structure and function of MAP/microtubule affinity regulating kinase 4. *J Biomol Struct Dyn* **2021**, *39*, 1781-1794, doi:10.1080/07391102.2020.1738959.
11. Pardo, O.E.; Castellano, L.; Munro, C.E.; Hu, Y.; Mauri, F.; Krell, J.; Lara, R.; Pinho, F.G.; Choudhury, T.; Frampton, A.E., et al. miR-515-5p controls cancer cell migration through MARK4 regulation. *EMBO Rep* **2016**, *17*, 570-584, doi:10.15252/embr.201540970.
12. Wang, Z.; Han, Y.; Li, Q.; Wang, B.; Ma, J. LncRNA DLGAP1-AS1 accelerates glioblastoma cell proliferation through targeting miR-515-5p/ROCK1/NFE2L1 axis and activating Wnt signaling pathway. *Brain Behav* **2021**, *11*, e2321, doi:10.1002/brb3.2321.
13. Zhang, Y.; Zhang, Y.; Wang, S.; Li, Q.; Cao, B.; Huang, B.; Wang, T.; Guo, R.; Liu, N. SP1-induced lncRNA ZFPM2 antisense RNA 1 (ZFPM2-AS1) aggravates glioma progression via the miR-515-5p/Superoxide dismutase 2 (SOD2) axis. *Bioengineered* **2021**, *12*, 2299-2310, doi:10.1080/21655979.2021.1934241.
